# Supplementary material for: Isolation and characterization of the C-class MADS-box gene involved in the formation of double flowers in Japanese gentian
Source: PubMed Central journal article supplement (PMC4504037; doi:10.1186/s12870-015-0569-3), 2015-07-17

**Supplementary Table S1. Sequences of primers used for RT-PCR and qRT-PCR analyses.**

| Targeted genes       | Primer sequence (5' →3' ) |                          | Fragment length |
|----------------------|---------------------------|--------------------------|-----------------|
|                      | Foward                    | Reverse                  |                 |
| For RT-PCR analysis  |                           |                          |                 |
| <i>GsAP1</i>         | AGCTCATGAGATTTTCAGTTCTG   | GCGCGGTATCAAGTTGTTGCTC   | 292             |
| <i>GsFUL</i>         | TCTCTGTGCTTTGTGATGCTGA    | GAAGCGGTGGTTGAATAGATAG   | 539             |
| <i>GsTM6</i>         | ACACCAGTCCTACCACCACGAC    | ACACCATCTCCGTCAACAAACG   | 420             |
| <i>GsAP3a</i>        | AATACATCAGCCCCGCCACTAC    | TATGAGCTCTGGTTGCTACTCG   | 505             |
| <i>GsAP3b</i>        | AGCTGACTGTTCTTTGTGATGC    | AGGTCCACCTCCATTTGAAAAC   | 474             |
| <i>GsPI1</i>         | GGATTGAAAACACAAGCAACAG    | TAGGGCATCCTCTAAAACCATC   | 334             |
| <i>GsPI2</i>         | TGGATCAATACCAGCAGTCTAC    | TCCATTCTCCACCACTCCTTTC   | 310             |
| <i>GsPI3</i>         | AGGAGTACATTAGCCCATCAAC    | GTAGAGACGCCTTTTTCAAGAG   | 216             |
| <i>GsAG1</i>         | ATTGTCTTCTCAACCCGTGGTC    | CCTGGCGAGAATAATGCTGATT   | 537             |
| <i>GsAG2</i>         | CTAGCAGTGGTCGCCTTTATGA    | CAATCTCAGCAGCCAACAACCTC  | 284             |
| <i>GsSTK1</i>        | GATGCTGAAGTTGCTCTTGTTG    | TCATTGTATTCTTGCCCAGGTG   | 433             |
| <i>GsSEP1</i>        | TCTGTTCTCTGTGATGCTGAGG    | AGGTGCTTGTTGTCTGCCTTCC   | 446             |
| <i>GsSEP2</i>        | CTCTGCAAGAGAAGCACTGGAG    | CTGTAGTCTGGTATCCCATTG    | 409             |
| <i>GsSEP3</i>        | TCTGTTCTCTGTGATGCTGAGG    | ATGAGGATTCGGATTCCATTGG   | 437             |
| <i>GsActin2</i>      | CTAAGCAAAGCCAGCAAGTCCT    | CACCAGAATCCAGCACAATACC   | 505             |
| <i>AtActin2</i>      |                           |                          |                 |
| For qRT-PCR analysis |                           |                          |                 |
| <i>GsAP1</i>         | GCATGGAGAATATCCTGGAGAG    | TCTTTGCAGCAACTCAACCTTA   | 137             |
| <i>GsFUL</i>         | GATCAATGGCACTGAATCTCAA    | GGGGATTCAGATCTTCTCCTTC   | 122             |
| <i>GsAP2</i>         | TTCTGGGAAGCAAGTTTATCTAGG  | TCAGCTATGGTGAAGTTGATGTCT | 120             |
| <i>GsAG1</i>         | GTGCAGATAGCTGAAAATGAGAGA  | AAGCCATGGATTGATGATGATT   | 97              |
| <i>GsAG2</i>         | GGAAGGAAGGGTTGAGAAAGGA    | GAGCTCAATCTCAGCAGCCAA    | 76              |
| <i>Ubiquitin</i>     | CGATTGATTTTGTGAAGCCAAAA   | TCCGGCAAATATCAACCTCTG    | 77              |

**Supplementary Table S2. Sequences of primers used for ALSV vector construction.**

| Targeted genes    | Primer sequence (5' →3' )     |
|-------------------|-------------------------------|
| GsAG1-U370(XhoI)  | ctcgagAACAGGAACATGCTTGGGGAAG  |
| GsAG1-L600(BamHI) | ggatccGGTGGCTCTCTCATTTTCAGC   |
| GsAG2-U424(XhoI)  | ctcgagTTGGAAGGAAGGGTTGAGAAAGG |
| GsAG2-L627(BamHI) | ggatccGTAATCAGATGCTGGCATGAA   |

Supplementary Figure S1

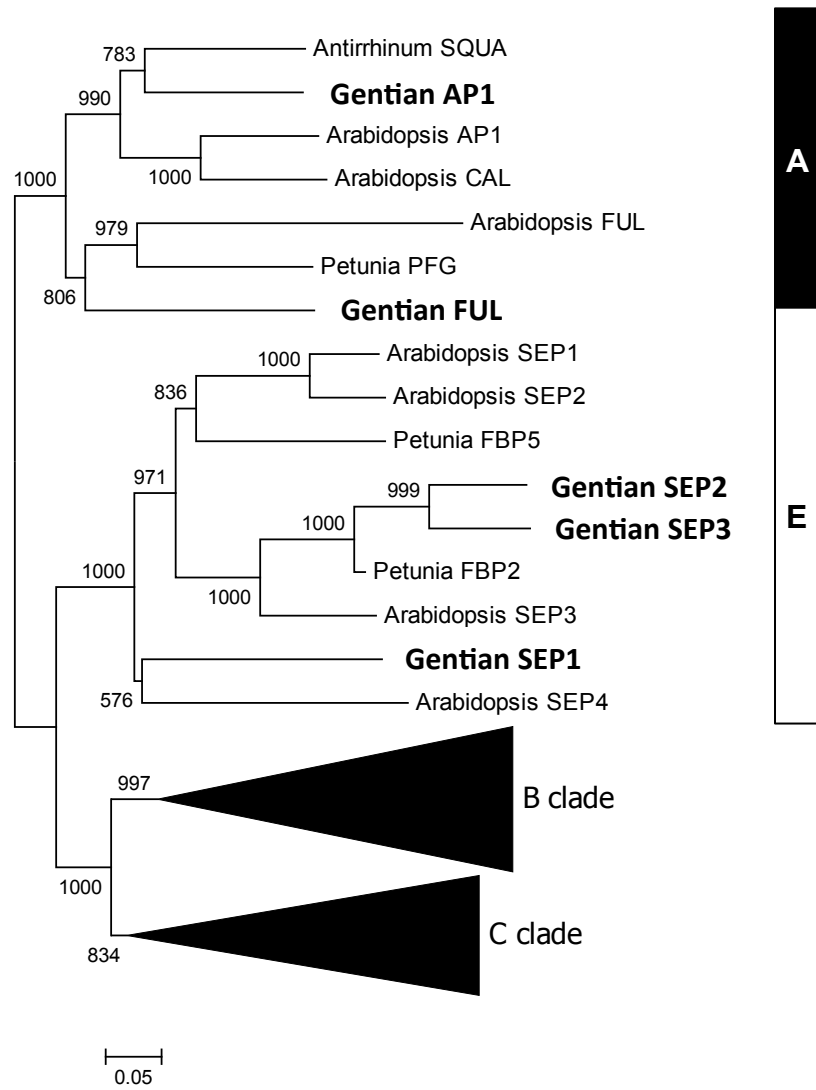

Supplementary Figure S2

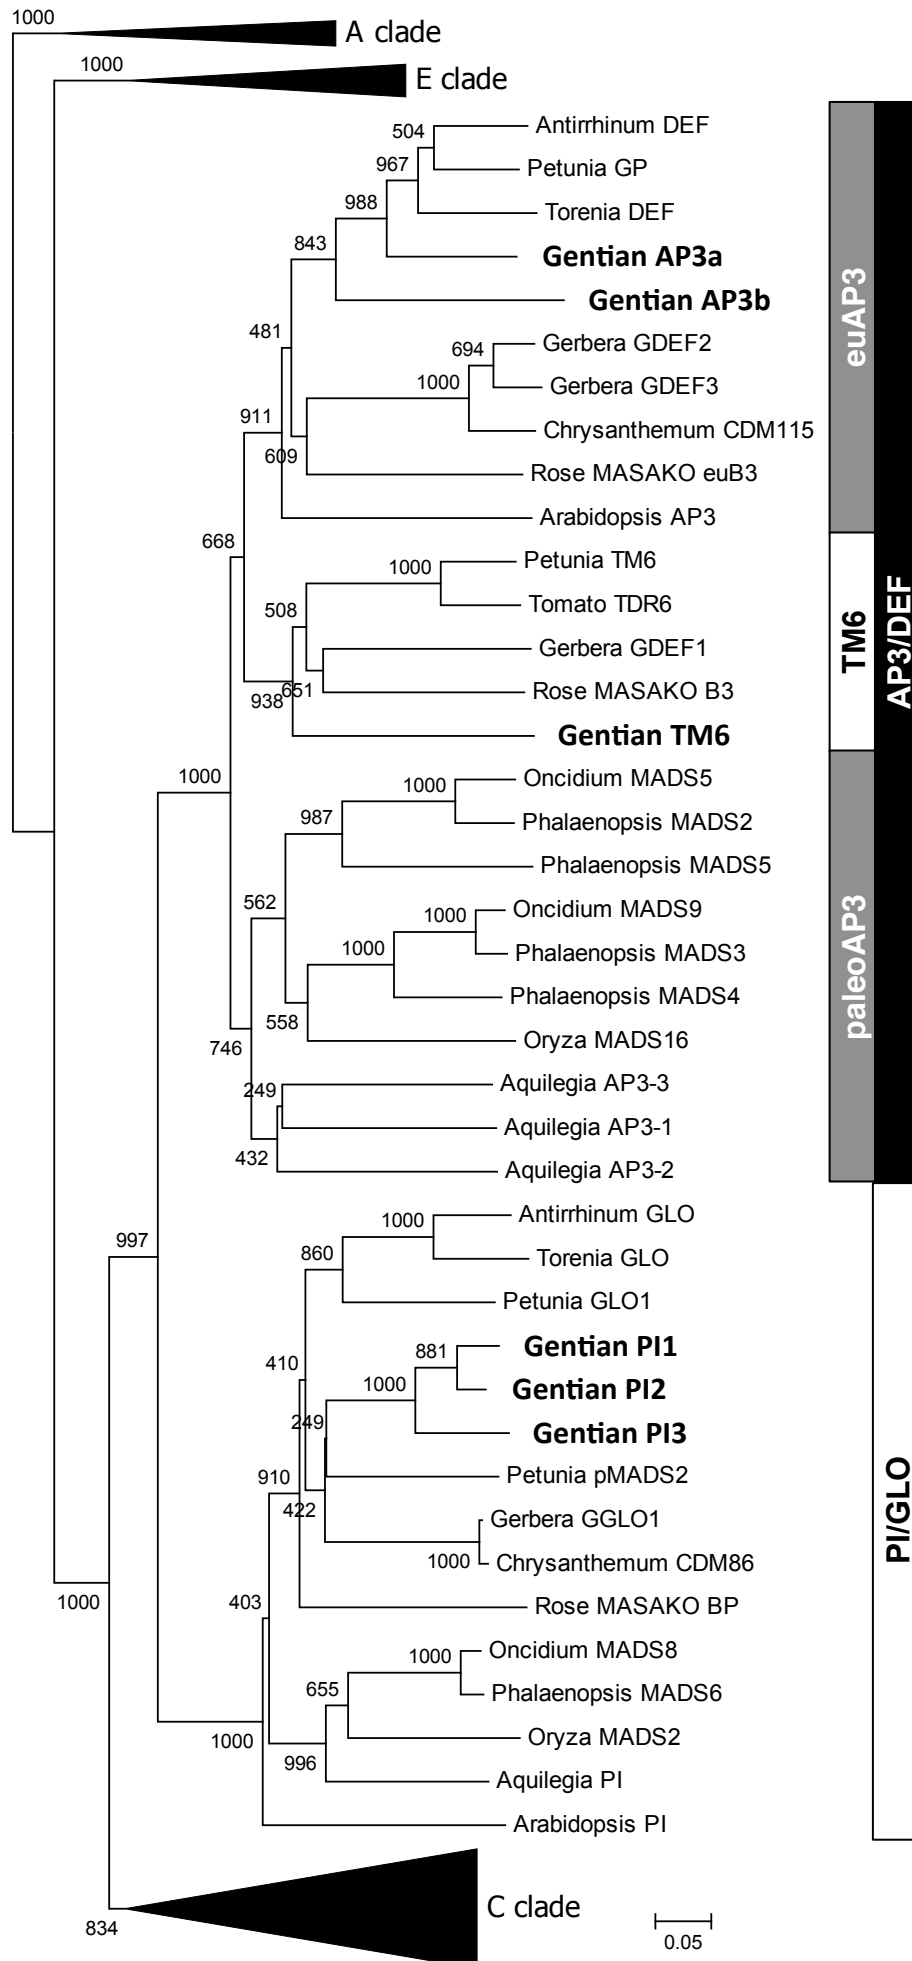

### Supplementary Figure S3

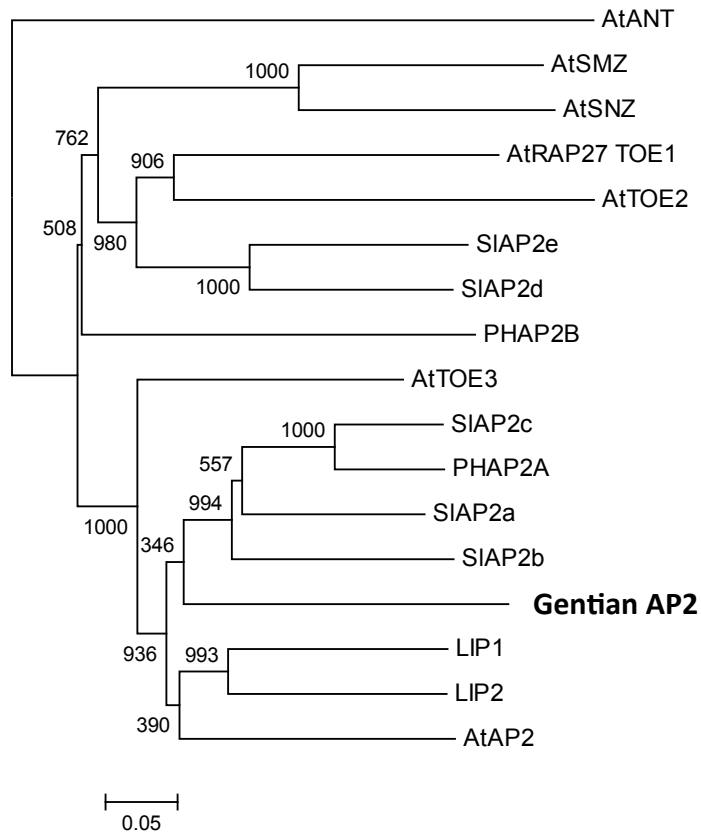

Supplementary Figure S4

**A**

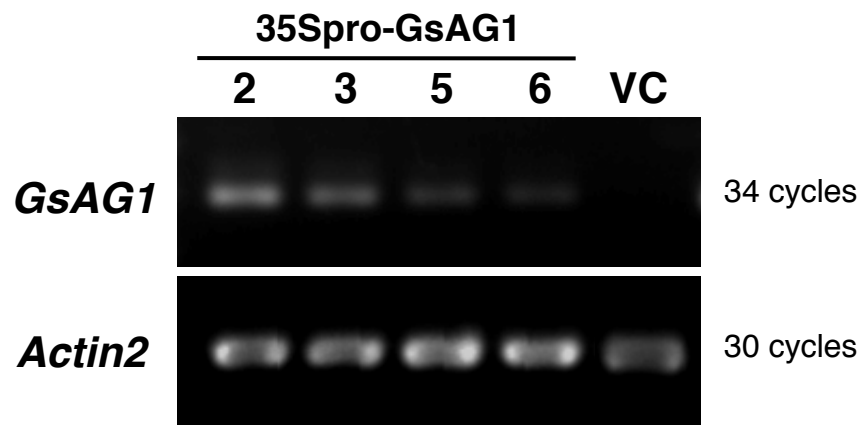

**B**

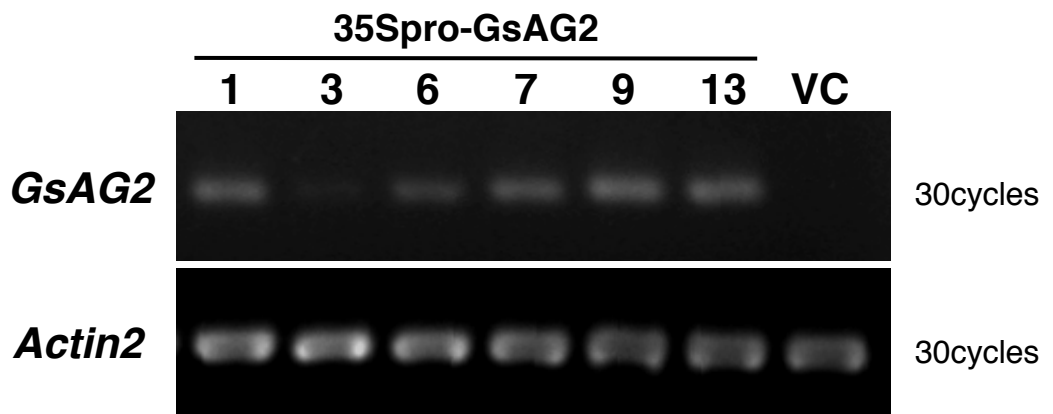

Supplement: 12870_2015_569_MOESM1_ESM.pdf [file 12870_2015_569_MOESM1_ESM.pdf]
